# Supplementary material
Source: PubMed Central journal article supplement (PMC4354201)
Supplement: ncomms7047-s1.pdf [file ncomms7047-s1.pdf]

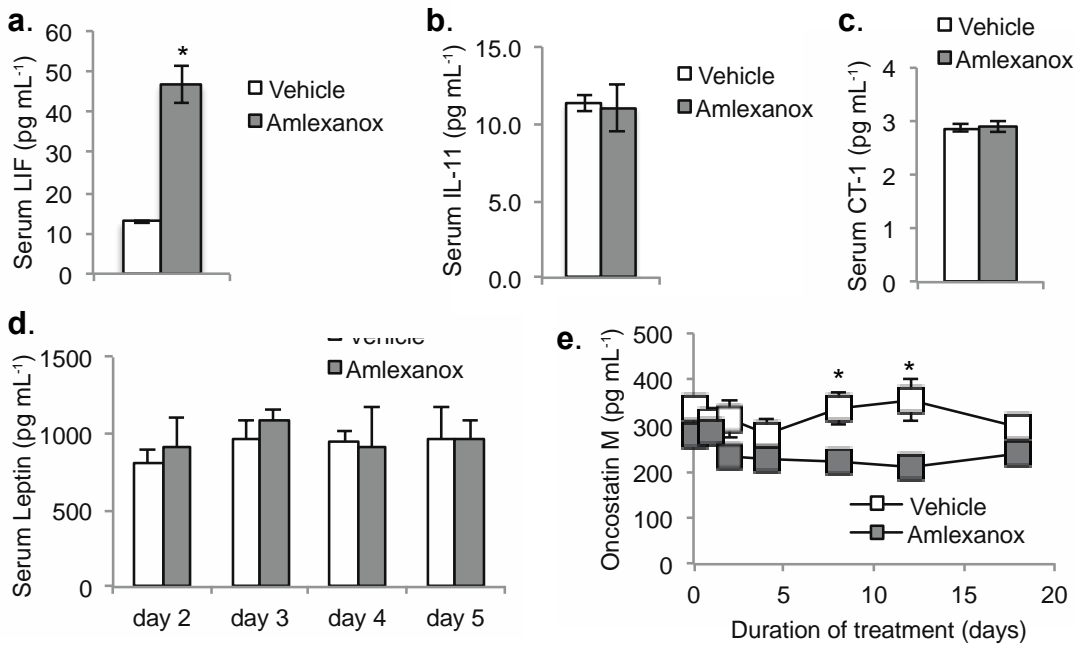

Supplementary Figure 1: **Induction of IL-6 family cytokines by amlexanox.** Serum levels of (a) leukemia inducible factor (LIF), (b) IL-10 and (c) Cardiotrophin-1 (CT-1) four hours after amlexanox treatment. (d) Serum leptin levels after amlexanox treatment. (e) Serum oncostatin M levels after amlexanox treatment. Differences in oncostatin M disappear when normalized to baseline. Serum cytokine and adipokine levels were quantified using the Mouse LIF Quantikine ELISA Kit (MLF00), Mouse IL-11 DuoSet (DY418), Mouse Cardiotrophin-1 (CT-1) DuoSet (DY438) and Mouse Leptin DuoSet (DY498) from R&D, as well as oncostatin-M Mouse, ELISA Kit from American Research Products. \* Indicates  $p$ -value < 0.05 [Student's t-test] vehicle versus amlexanox. Error bars presented as standard error from the mean.

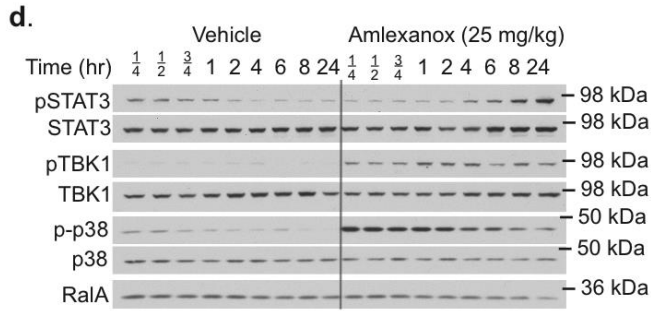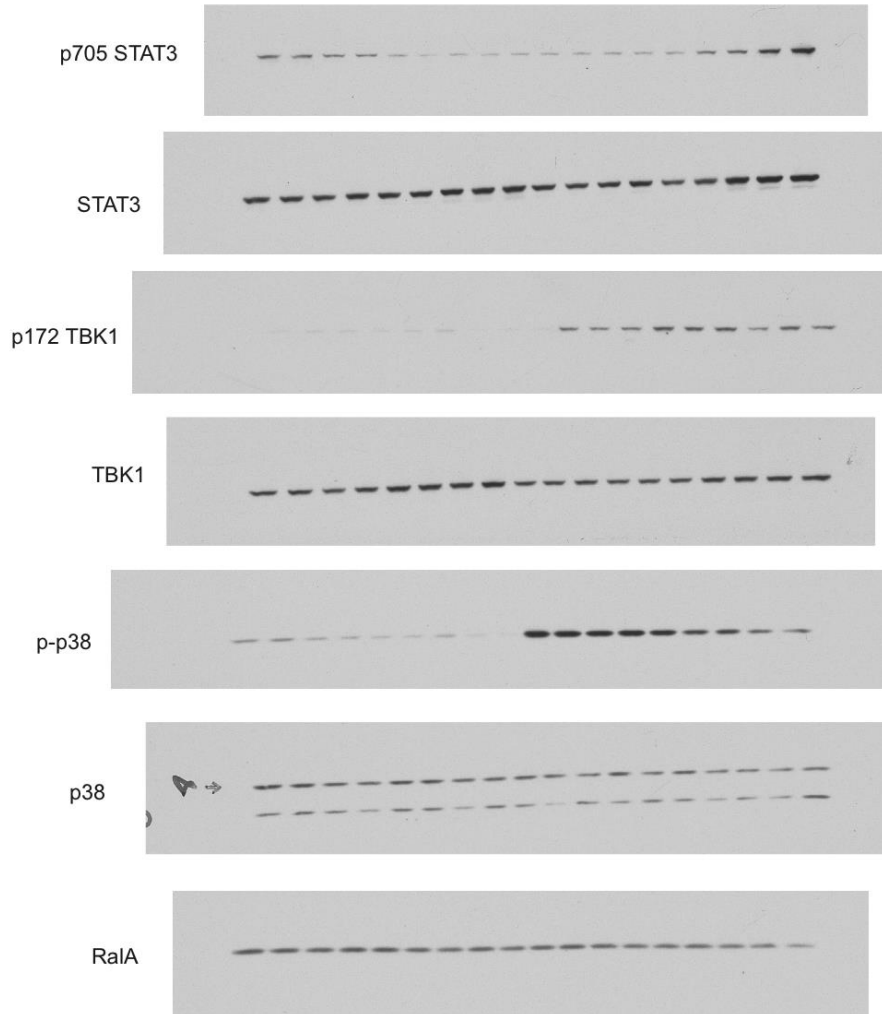

Supplementary Figure 2: **Full western blot scans for Fig. 4d.** The full scans for each blot are shown underneath

a.

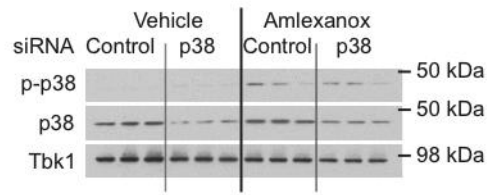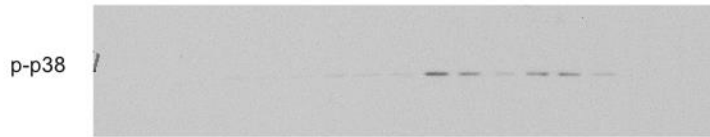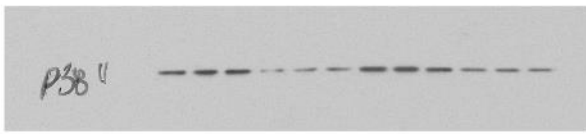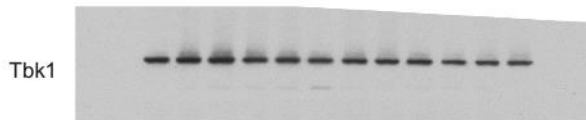

Supplementary Figure 3: **Full western blot scans for Fig. 5a.** The full scans for each blot are shown underneath

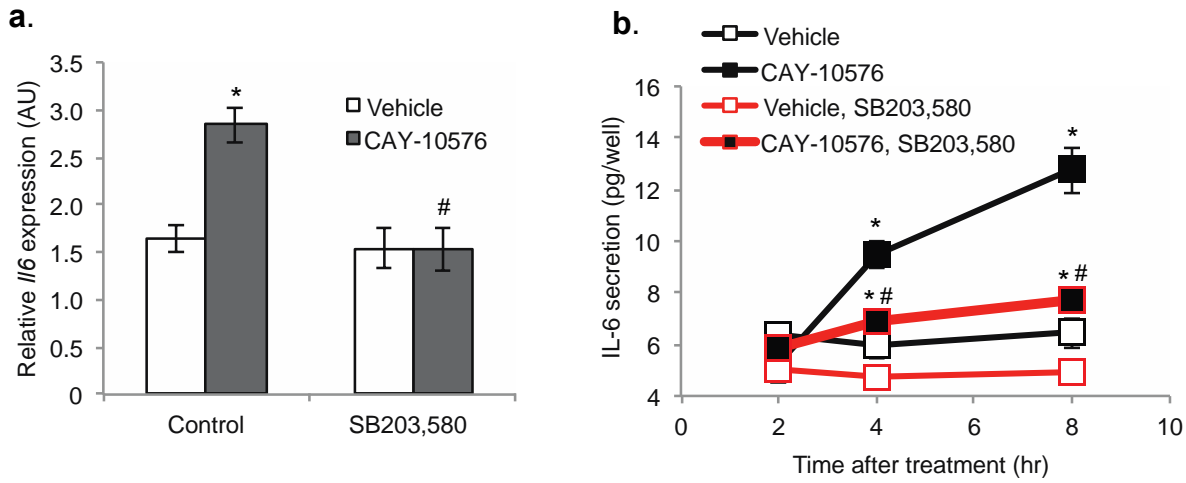

Supplementary Figure 4: **Induction of IL-6 after treatment with CAY-10576.** (a) *Il6* expression level in cells treated with 1  $\mu$ M CAY-10576 for 2 hours after 30 min pretreatment with SB203,580. (b) IL-6 secretion into the media. \* Indicates  $p$ -value < 0.05 CAY-10576 versus vehicle. # Indicates  $p$ -value < 0.05 CAY-10576, SB203,580 versus CAY-10576. Error bars presented as standard error from the mean.

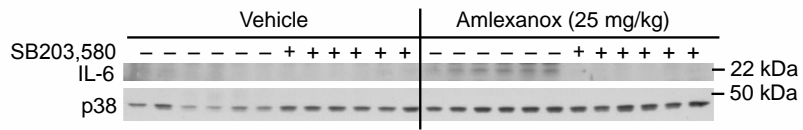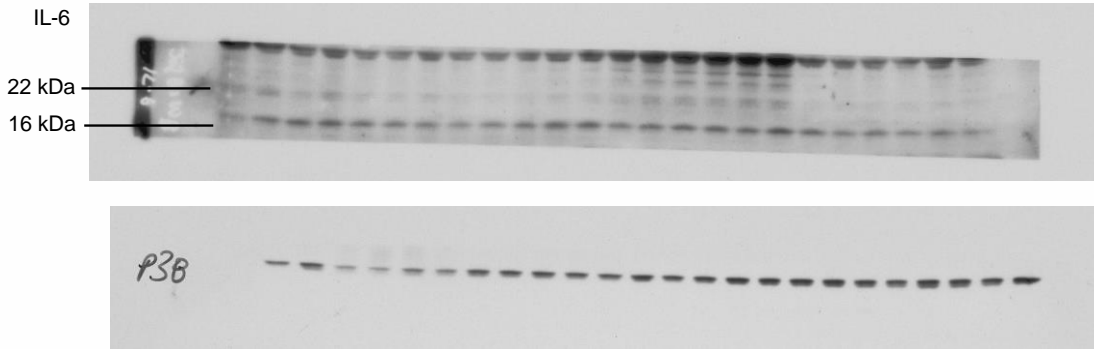

Supplementary Figure 5: **Full western blot scans for Fig. 6d.** The full scans for each blot are shown underneath. Precursor IL-6 (MW 24 kDa) is shown in the main figure. Higher MW species are likely processed forms of IL-6.

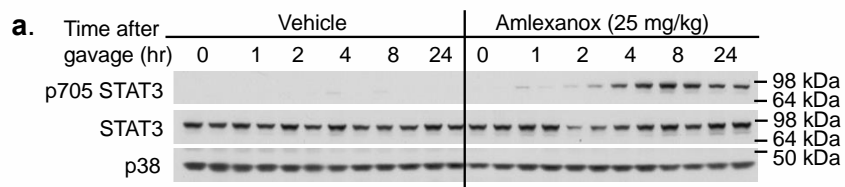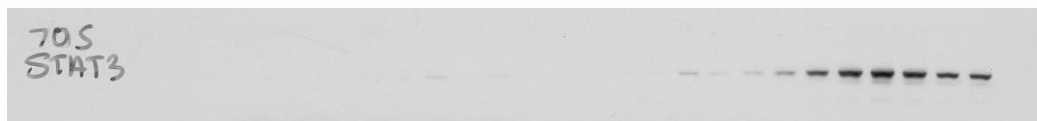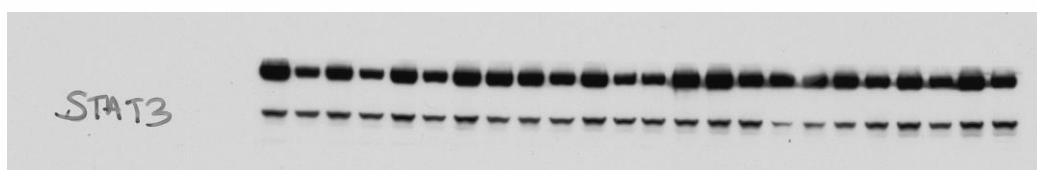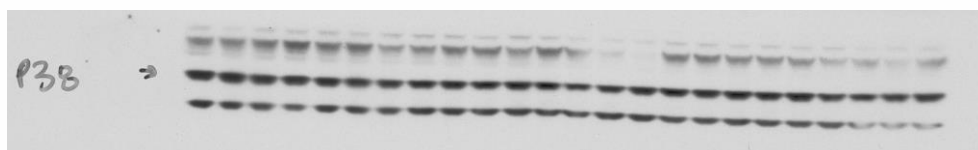

Supplementary Figure 6: **Full western blot scans for Fig. 7a.** The full scans for each blot are shown underneath.

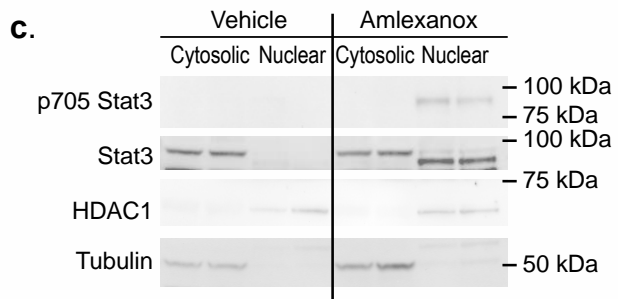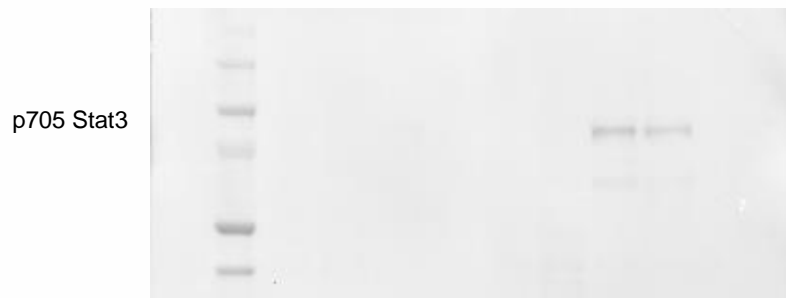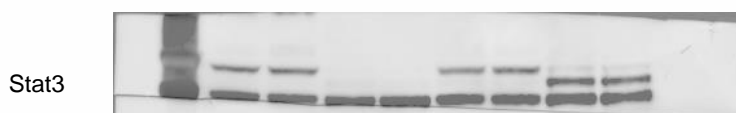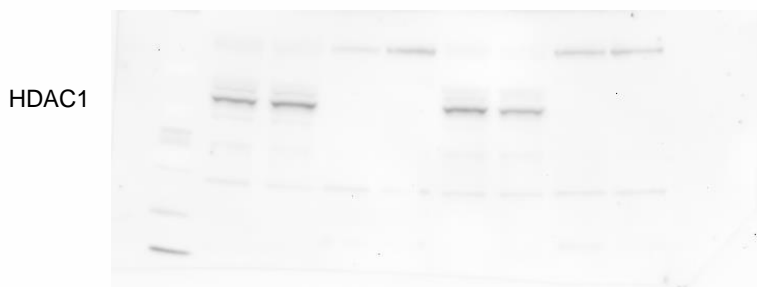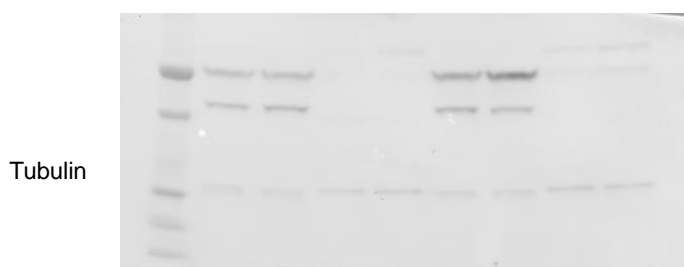

Supplementary Figure 7: **Full western blot scans for Fig. 7c.** The full scans for each blot are shown underneath.

**b.**

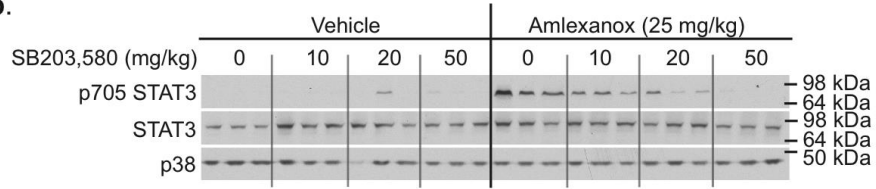

p705 STAT3

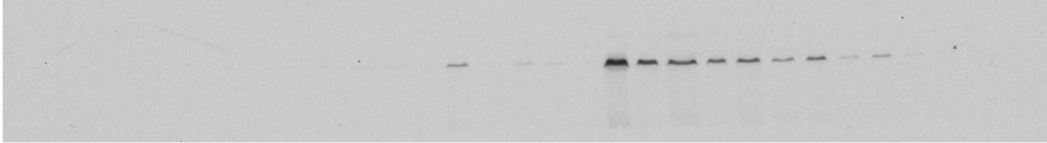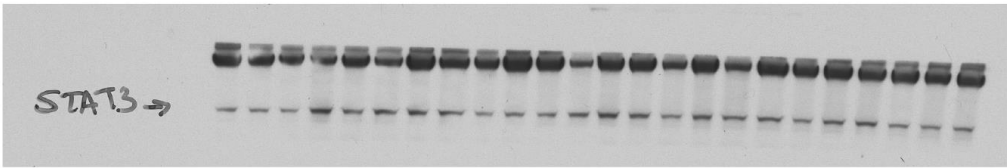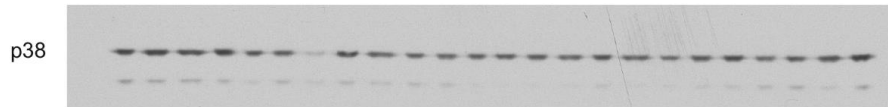

Supplementary Figure 8: **Full western blot scans for Fig. 7d.** The full scans for each blot are shown underneath.



g. Amlexanox (25mg/kg) - + + + + + + + + + + + + + + + +  
 IgG NA (x100µg) 5 1 1 2 2 5 5 - - - - - - - - - - - - -  
 IL-6 NA (x100µg) - - - - - - - 1 1 1 2 2 2 5 5 5  
 p705 STAT3 - - - - - - - - - - - - - - - - - - - - - - - - -  
 STAT3 - - - - - - - - - - - - - - - - - - - - - - - - -  
 RalA - - - - - - - - - - - - - - - - - - - - - - - - -

98 kDa  
64 kDa  
98 kDa  
64 kDa  
36 kDa

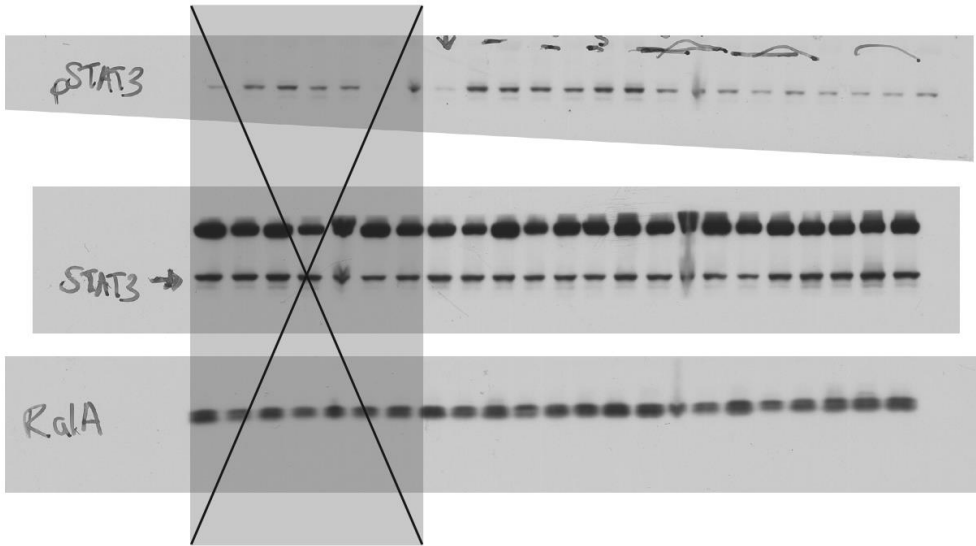

Supplementary Figure 9: **Western blot scans for Fig. 7g.** The full scans for each blot are shown underneath. The excluded section of the gel contains samples from mice treated with neutralizing antibodies intravenously. Marks above pStat3 are permanent marker.

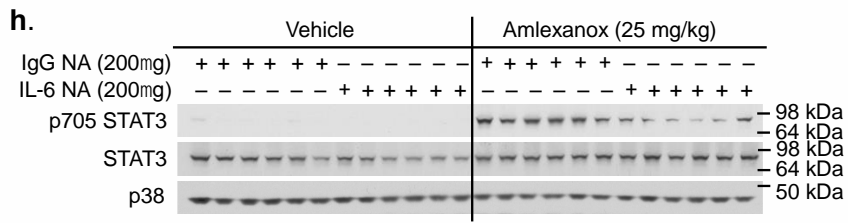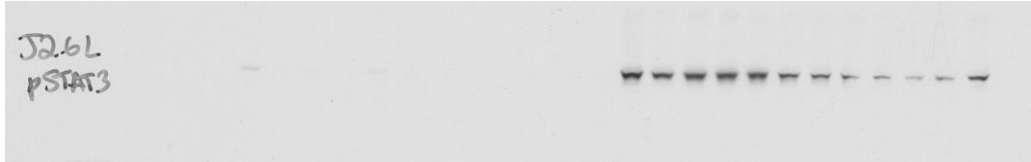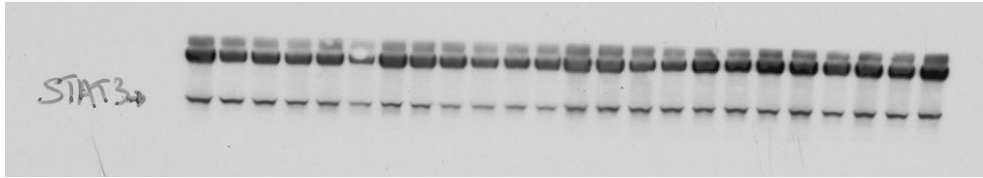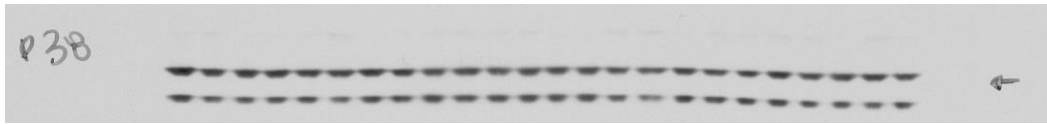

Supplementary Figure 10: **Full western blot scans for Fig. 7h.** The full scans for each blot are shown underneath.

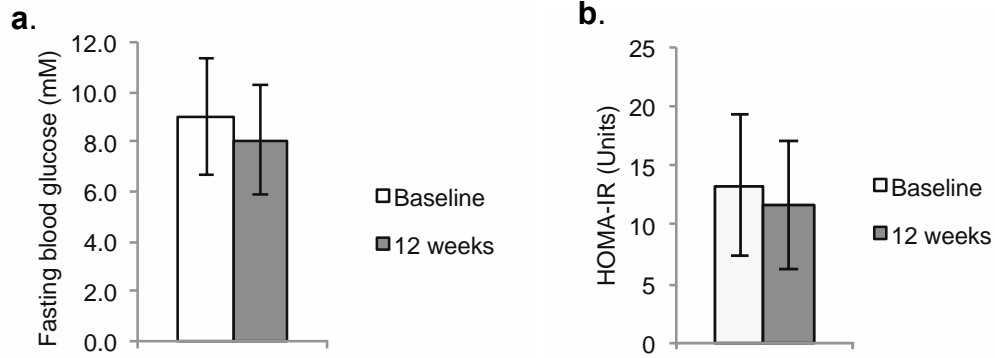

Supplementary Figure 11: **Open label amlexanox trial.** (a) Fasting blood glucose levels and (b) HOMA-IR score at baseline and after 12 weeks of amlexanox treatment ( $n = 6$  patients). Error bars presented as standard error from the mean.

Supplementary Table 1: **KEGG pathway analysis of RNA sequencing data**

| Term                                            | Count | %    | PValue   | Genes                                                                                                                                                                                          |
|-------------------------------------------------|-------|------|----------|------------------------------------------------------------------------------------------------------------------------------------------------------------------------------------------------|
| mmu04920:Adipocytokine signaling pathway        | 15    | 0.17 | 0.000001 | IRS2, SOCS3, LEPR, RXRG, PRKAB1, PPARGC1A, ADIPOQ, IRS1, STAT3, CAMKK2, LEP, TNFRSF1A, G6PC, CD36, SLC2A1                                                                                      |
| mmu04630:Jak-STAT signaling pathway             | 19    | 0.22 | 0.000104 | IL22RA1, SOCS2, OSMR, CSF2RB2, IL6ST, SOCS3, LEPR, IL4RA, SOCS1, PIM1, CISH, STAT3, SPRY4, LEP, PRLR, PIAS3, SPRED1, JAK3, IL13RA1                                                             |
| mmu04210:Apoptosis                              | 13    | 0.15 | 0.000372 | BID, IL1R1, CSF2RB2, ATM, IRAK4, TNFRSF1A, IRAK3, TNFSF10, MYD88, CASP9, RIPK1, CASP8, FAS                                                                                                     |
| mmu05200:Pathways in cancer                     | 29    | 0.33 | 0.000372 | BID, WNT5B, PDGFB, CDH1, ARNT, CASP9, CASP8, SLC2A1, TGFA, RARA, FAS, FH1, FZD8, COL4A1, RXRG, FZD1, BRCA2, SMAD3, DAPK2, FZD5, FZD4, STAT3, CDKN1A, RASSF5, PIAS3, JUN, RASSF1, PDGFRA, PTCH1 |
| mmu04115:p53 signaling pathway                  | 11    | 0.13 | 0.000769 | BID, CDKN1A, CASP9, BBC3, GADD45G, SERPINE1, CASP8, FAS, CCNG2, GADD45A, ATM                                                                                                                   |
| mmu04060:Cytokine-cytokine receptor interaction | 21    | 0.24 | 0.004945 | CXCL1, TNFRSF21, IL1R1, IL22RA1, PDGFB, OSMR, CSF2RB2, IL6ST, LEPR, IL4RA, TNFSF14, IL17RA, CCL6, LEP, INHBB, TNFRSF1A, TNFSF10, PRLR, PDGFRA, FAS, IL13RA1                                    |
| mmu04010:MAPK signaling pathway                 | 21    | 0.24 | 0.011851 | IL1R1, PDGFB, MRAS, GNA12, MAP3K6, TNFRSF1A, RPS6KA1, JUN, MAP3K1, MAP3K8, NTRK2, JUND, GADD45G, PDGFRA, RAP1B, FAS, DUSP8, MAP3K13, GADD45A, MAP2K6, DUSP6                                    |
| mmu00140:Steroid hormone biosynthesis           | 7     | 0.08 | 0.013060 | HSD3B2, CYP3A13, CYP7A1, CYP21A1, HSD3B5, SRD5A1, SULT1E1                                                                                                                                      |
| mmu04930:Type II diabetes mellitus              | 7     | 0.08 | 0.019393 | PRKCZ, IRS2, SOCS2, SOCS3, SOCS1, ADIPOQ, IRS1                                                                                                                                                 |
| mmu04620:Toll-like receptor signaling pathway   | 10    | 0.11 | 0.029096 | IRAK4, MYD88, JUN, RIPK1, MAP3K8, TICAM1, CASP8, TIRAP, LBP, MAP2K6                                                                                                                            |
| mmu04530:Tight junction                         | 12    | 0.14 | 0.034407 | ACTG1, PRKCZ, OCLN, MPDZ, CGN, MRAS, EPB4.1, CLDN1, MYH9, TJP3, MLLT4, CLDN14                                                                                                                  |
| mmu04670:Leukocyte transendothelial migration   | 11    | 0.13 | 0.035579 | ACTG1, VCAM1, ICAM1, RASSF5, OCLN, BCAR1, CLDN1, RAP1B, MLLT4, CLDN14, ITGAM                                                                                                                   |
| mmu04910:Insulin signaling pathway              | 12    | 0.14 | 0.039459 | PRKCZ, G6PC, IRS2, SOCS2, TSC1, SOCS3, SOCS1, FLOT1, PRKAB1, PTPN1, PPARGC1A, IRS1                                                                                                             |
| mmu00982:Drug metabolism                        | 8     | 0.09 | 0.045452 | CYP2C70, GSTM3, CYP3A13, FMO2, CYP2B9, FMO3, CYP2B13, CYP2A4                                                                                                                                   |

Supplementary Table 2: **Q-PCR primer sequences**

| <b>Gene</b>   | <b>Forward primer</b>         | <b>Reverse primer</b>        |
|---------------|-------------------------------|------------------------------|
| <i>Adipoq</i> | 5'-GCAGGCATCCCAGGACATC-3'     | 5'-GCGATACATATAAGCGGCTTCT-3' |
| <i>Arbp</i>   | 5'-CACTGGTCTAGGACCCGAGAA-3'   | 5'-AGGGGGAGATGTTTCAGCATGT-3' |
| <i>Emr1</i>   | 5'-CTGGGATCCTACAGCTGCTC-3'    | 5'-AGGAGCCTGGTACATTGGTG-3'   |
| <i>G6pc</i>   | 5'-CGACTCGCTATCTCCAAGTGA-3'   | 5'-GTTGAACCAGTCTCCGACCA-3'   |
| <i>Il6</i>    | 5'-TAGTCCTTCCTACCCCAATTTCC-3' | 5'-TTGGTCCTTAGCCACTCCTTC-3'  |
| <i>Mapk14</i> | 5'-GGCTCGGCACACTGATGAT-3'     | 5'-TGGGGTTCCAACGAGTCTTAAA-3' |
| <i>Pdgfra</i> | 5'-AGAGTTACACGTTTGAGCTGTC-3'  | 5'-GTCCCTCCACGGTACTCCT-3'    |
| <i>Socs3</i>  | 5'-ATGGTCACCCACAGCAAGTTT-3'   | 5'-TCCACTAGAATCCGCTCTCCT-3'  |
| <i>Tnfa</i>   | 5'-ACGGCATGGATCTCAAAGAC-3'    | 5'-AGATAGCAAATCGGCTGACG-3'   |

Supplementary Table 3: **ChIP primer sequences**

| <b>Promoter</b>        | <b>Forward primer</b>            | <b>Reverse primer</b>       |
|------------------------|----------------------------------|-----------------------------|
| <i>Socs3</i>           | 5'-CACAGCCTTTCAGTGCAGAG-3'       | 5'-GGGTATTTACCCGGCCAGT-3'   |
| <i>G6pc</i> (region A) | 5'-CAACTCAAACCTGTAAAGAAAAGAAA-3' | 5'-TGAATGACCTCCCCCTCCT-3'   |
| <i>G6pc</i> (region B) | 5'-CACACACACACACAGAGAGACAG-3'    | 5'-GCACAATCCTGTATTCCGACT-3' |
| <i>G6pc</i> (region C) | 5'-GTCCCAGTCGGAATACAGGA-3'       | 5'-TGCCACCTTCTGCTGAGAC-3'   |
| <i>G6pc</i> (region E) | 5'-AATGGCGATCAGGCTGTTT-3'        | 5'-CAATCCAGCCCTGATCTTTG-3'  |
